# Supplementary material
Source: Royal Society of Chemistry journal article supplement (doi:10.1039/d5gc07018j)
Supplement: d5gc07018j1.pdf [file d5gc07018j1.pdf]

## Supporting Information

# Synergistically Enhanced Co-Adsorption of HMF and Hydroxyl on Selenium and Oxygen Dual Vacancies in CeO<sub>2</sub>-CuNiSe<sub>2</sub>/NF for High-Efficiency HMF Electrooxidation

Junpu An<sup>†</sup>, Fan Yang<sup>\*</sup>, Hongchen Liu, Kexin Wei, Chunhui Yu, Siyuan Sun, Yang Sun, Jiahui Liu, Xinyang Sun, Ruijing Feng and Yongfeng Li<sup>\*</sup>

<sup>†</sup>Affiliation 1: State Key Laboratory of Heavy Oil Processing, China University of Petroleum, Beijing, 102249, China

---

\* Corresponding author: [yangfan@cup.edu.cn](mailto:yangfan@cup.edu.cn) (Fan Yang)

\* Corresponding author: [yfli@cup.edu.cn](mailto:yfli@cup.edu.cn) (Yongfeng Li)

## Electrochemical measurements

A standard H-cell, equipped with an FAA-3-50 membrane as the separator, was utilized for all electrochemical measurements with a CHI 760E electrochemical workstation. The system was configured with a three-electrode arrangement: a working electrode (geometric area: 1 cm<sup>2</sup>), a platinum counter electrode, and a Hg/HgO reference electrode (internal electrolyte: 1 M KOH). The electrolyte for OER measurements consisted of 20 mL of 1 M KOH. For HMFOR experiments, the alkaline electrolyte was supplemented with 100 mM HMF. The potential measured against the Hg/HgO reference electrode was standardized to the reversible hydrogen electrode (RHE) scale using the following equation:

$$E(\text{RHE}) = E(\text{Hg}/\text{HgO}) + 0.059 \cdot \text{pH} + 0.098$$

The electrocatalytic activity for the hydrogen evolution reaction (HER), OER, and HMFOR was evaluated via LSV at a scan rate of 5 mV s<sup>-1</sup>. The applied potential range was -0.6 to -1.4 V vs. Hg/HgO for HER and 0 to 0.8 V vs. Hg/HgO for OER and HMFOR.

The Tafel slope (b) was derived from the Tafel equation,  $|\eta| = a + b \log |j|$ , where  $\eta$  is the overpotential, a is a constant, and j is the current density.

Electrochemical impedance spectroscopy (EIS) characterization employed a fixed applied potential with frequencies sweeping from 100 kHz down to 0.1 Hz. A potential of 0.6 V vs. Hg/HgO was applied to the anode. For the determination of double-layer capacitance ( $C_{dl}$ ), cyclic voltammetry (CV) scans were recorded at multiple scan rates (20-100 mV s<sup>-1</sup>) within a non-Faradaic potential window. Subsequently, the ECSA was evaluated based on the  $C_{dl}$  values and the specific capacitance ( $C_s = 40 \mu\text{F cm}^{-2}$ ) of an ideal flat electrode, according to the relationship  $\text{ECSA} = C_{dl} / C_s$ .

A flow cell setup was used to test the water electrolysis reaction. CeO<sub>2</sub>-CuNiSe<sub>2</sub>/NF with a size of 2 × 2 cm was employed as both the cathode and anode electrocatalyst, with a flow rate of 2.6 mL/min and a reservoir volume of 50 mL. No reference electrode is used in the flow cell. The water electrolysis activity in the

electrolyzer was investigated by applying a potential of 1.1-1.8 V.

## High performance liquid chromatography analysis

Quantitative analysis of HMF and its derivatives was performed on a Shimadzu LC-10ADVP high-performance liquid chromatography (HPLC) system. For analysis, 20  $\mu\text{L}$  aliquots were periodically withdrawn during constant-potential electrolysis, diluted 50 times with deionized water, and subjected to HPLC. The separation employed a C18 column with detection at 265 nm, employing a mobile phase of methanol and 5 mM ammonium formate solution (3:7) at a flow rate of 1.0  $\text{mL min}^{-1}$ . Subsequent quantification relied on external calibration curves generated from pure standards, which provided the basis for calculating HMF conversion, FDCA selectivity, and FE.

$$\text{Conversion (\%)} = (\text{mol of HMF consumed}) / (\text{mol of initial HMF}) \times 100\%$$

$$\text{Selectivity (\%)} = (\text{mol of FDCA yield}) / (\text{mol of initial HMF}) \times 100\%$$

$$\text{Faradic efficiency (\%)} = (\text{mol of FDCA yield} \times 6 \times F) / (\text{total charge passed}) \times 100\%$$

Here,  $F$  represents the Faraday constant ( $96,485 \text{ C mol}^{-1}$ ), and the factor 6 corresponds to the number of electrons transferred per molecule of FDCA formed.

## Theoretical calculation

The density functional theory (DFT) computations in this work were carried out employing the CASTEP software package with spin polarization included. The exchange-correlation effects were described by the Perdew-Burke-Ernzerhof (PBE) functional under the generalized gradient approximation (GGA), augmented by Tkatchenko-Scheffler scheme for dispersion interactions. A plane-wave basis set with a cutoff energy of 450 eV was adopted, and k-space integration was performed using a  $2 \times 2 \times 1$  Monkhorst-Pack mesh. For structural relaxation, convergence criteria were set to stringent values of  $1.0 \times 10^{-5}$  eV/atom for energy, 0.01 eV/Å for maximum force, and 0.001 Å for maximum displacement. Convergence in the self-consistent field cycles was achieved when the energy difference was below  $2 \times 10^{-6}$  eV/atom, aided by a Fermi smearing width of 0.25 eV.

The adsorption energy was computed as  $E_{\text{ads}} = E_{\text{mol/sub}} - (E_{\text{mol}} + E_{\text{sub}})$ , where

$E_{\text{mol/sub}}$ ,  $E_{\text{mol}}$ , and  $E_{\text{sub}}$  correspond to the total energy of the adsorbed system, the energy of the free molecule in the gas phase, and the energy of the pristine catalyst surface, respectively.

## 1. Supplementary Figures

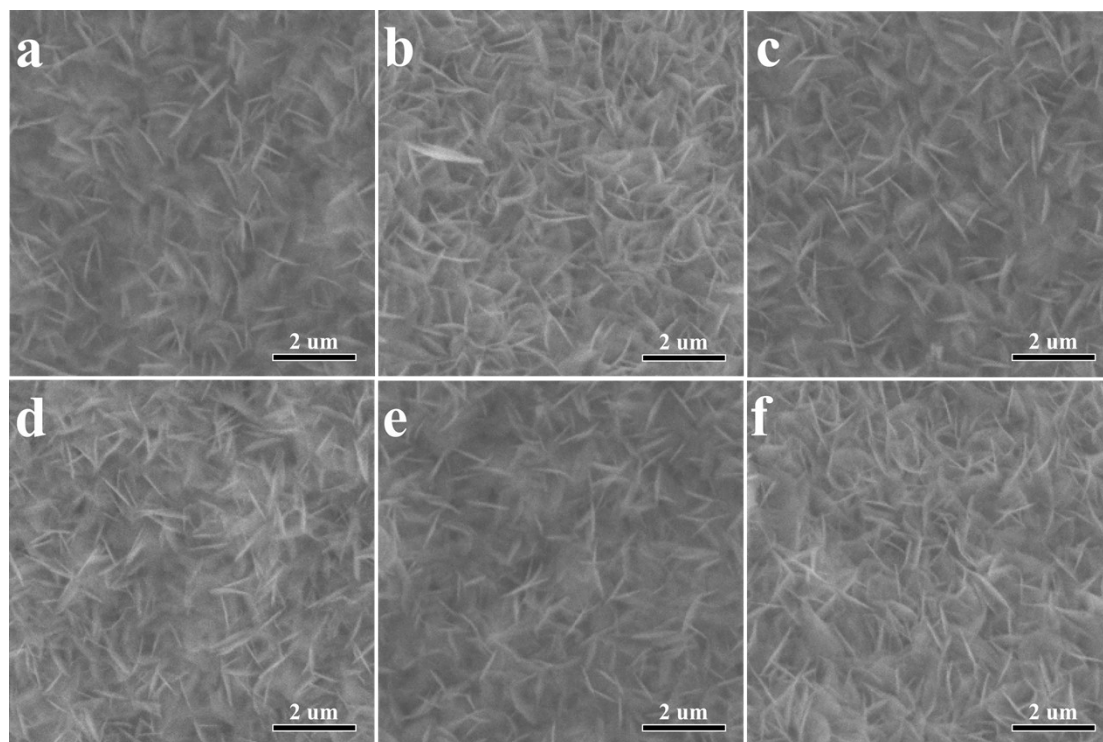

**Figure S1.** Scanning electron microscope (SEM) images: (a) Ce-CuNi precursors, (b) CeO<sub>2</sub>/NF, (c) Cu<sub>2</sub>Se/NF, (d) NiSe<sub>2</sub>/NF, (e) CuNiSe<sub>2</sub>/NF, and (f) CeO<sub>2</sub>-NiSe<sub>2</sub>/NF

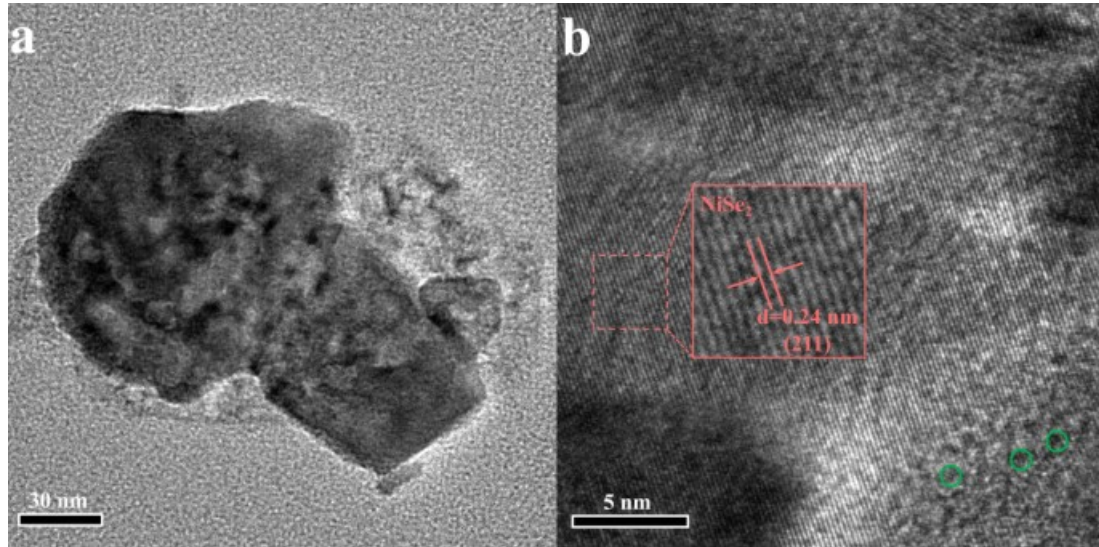

**Figure S2.** HR-TEM images of NiSe<sub>2</sub>/NF (a and b).

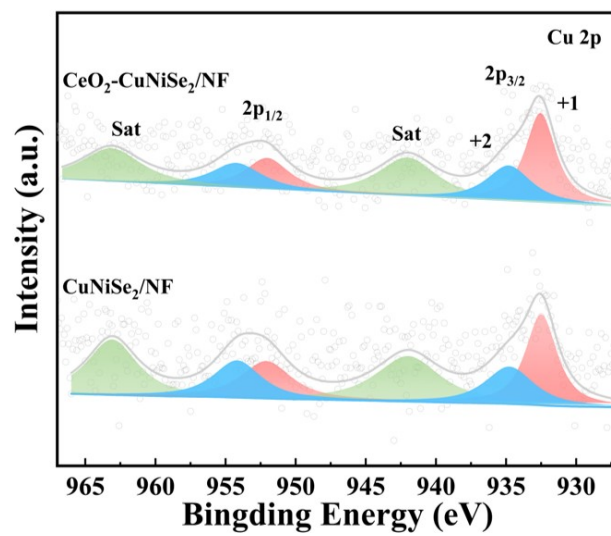

**Figure S3.** Cu 2p of CeO<sub>2</sub>-CuNiSe<sub>2</sub>/NF and CuNiSe<sub>2</sub>/NF.

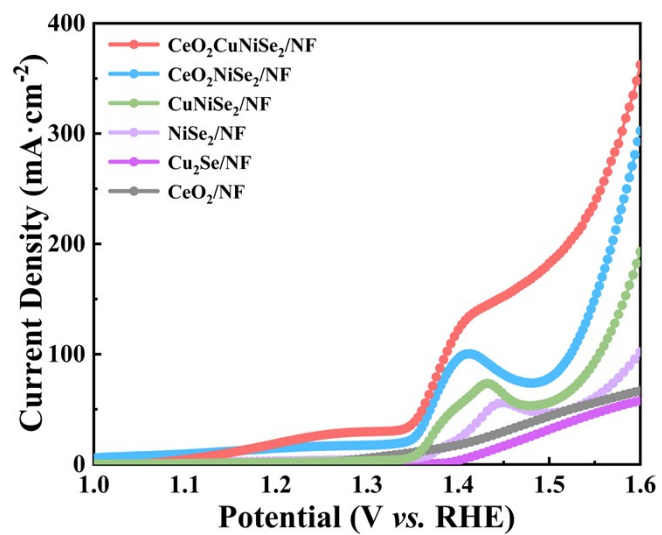

**Figure S4.** LSV curves of different samples in 1.0 M KOH.

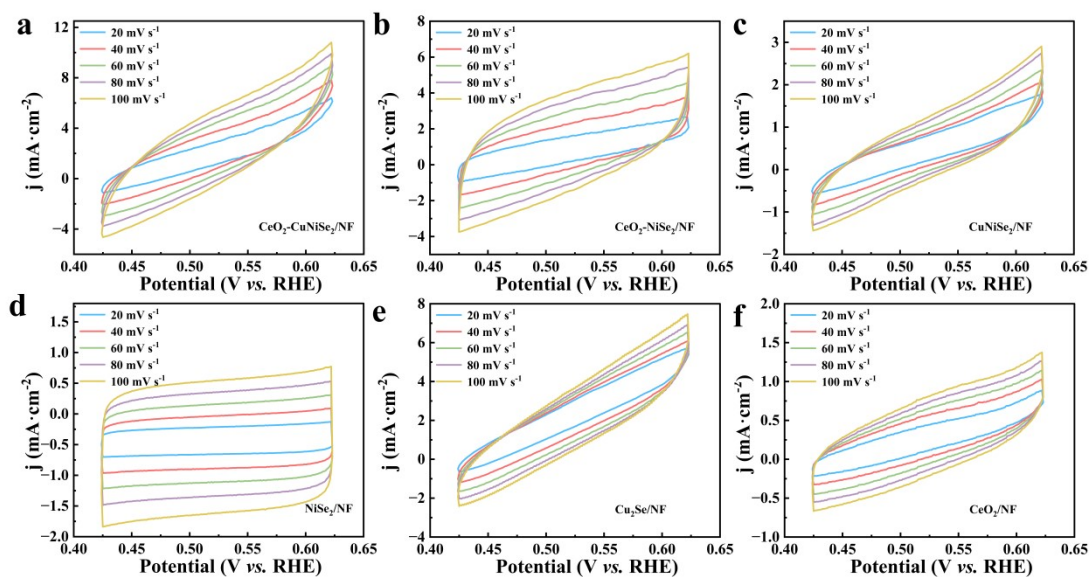

**Figure S5.** CV curves of (a)  $\text{CeO}_2\text{-CuNiSe}_2/\text{NF}$ , (b)  $\text{CeO}_2\text{-NiSe}_2/\text{NF}$ , (c)  $\text{CuNiSe}_2/\text{NF}$ , (d)  $\text{NiSe}_2/\text{NF}$ , (e)  $\text{Cu}_2\text{Se}/\text{NF}$ , and (f)  $\text{CeO}_2/\text{NF}$  at 20, 40, 60, 80, and 100  $\text{mV s}^{-1}$  in 1 M KOH and 100 mM HMF.

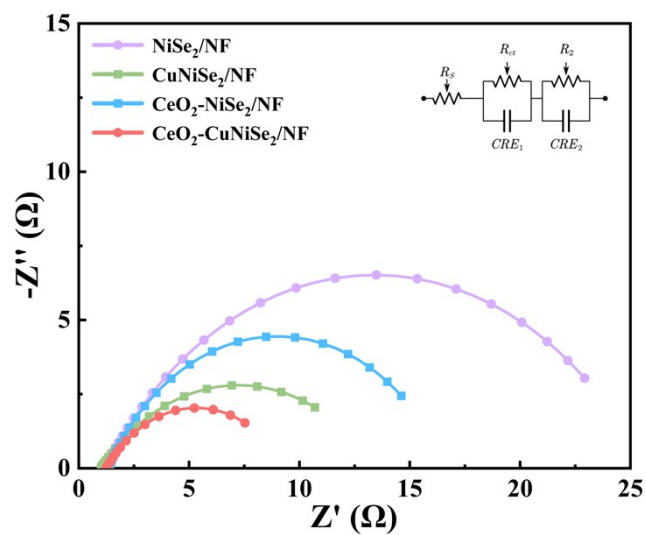

**Figure S6.** Nyquist plots (e) and Cdl values (e) of CeO<sub>2</sub>-CuNiSe<sub>2</sub>/NF, CeO<sub>2</sub>-NiSe<sub>2</sub>/NF, CuNiSe<sub>2</sub>/NF, NiSe<sub>2</sub>/NF, Cu<sub>2</sub>Se/NF and CeO<sub>2</sub>/NF.

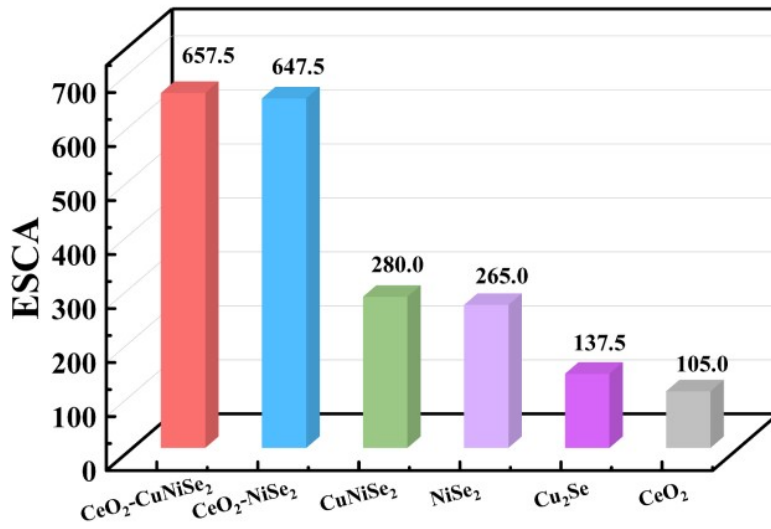

**Figure S7.** ECSA values of CeO<sub>2</sub>-CuNiSe<sub>2</sub>/NF, CeO<sub>2</sub>-NiSe<sub>2</sub>/NF, CuNiSe<sub>2</sub>/NF, NiSe<sub>2</sub>/NF, Cu<sub>2</sub>Se/NF and CeO<sub>2</sub>/NF

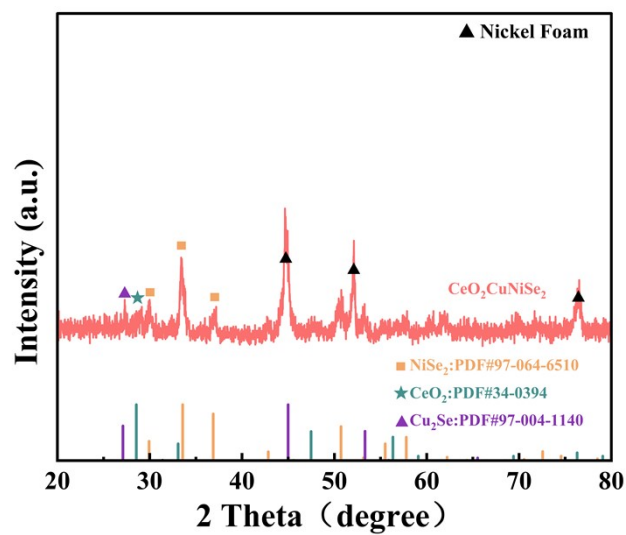

Figure S8. XRD pattern of CeO<sub>2</sub>-CuNiSe<sub>2</sub>/NF HMFOR after testing.

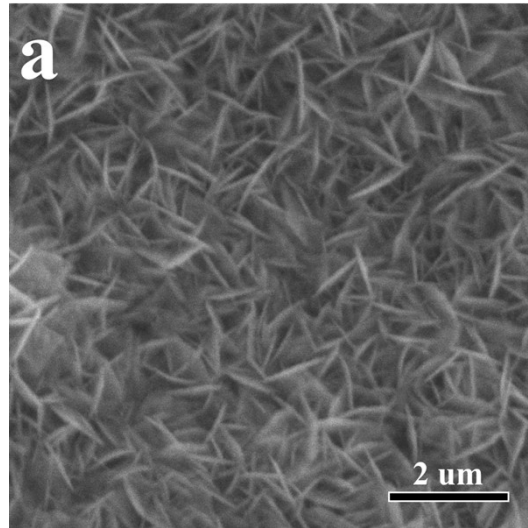

**Figure S9.** SEM of  $\text{CeO}_2\text{-CuNiSe}_2/\text{NF}$  HMFOR after testing.

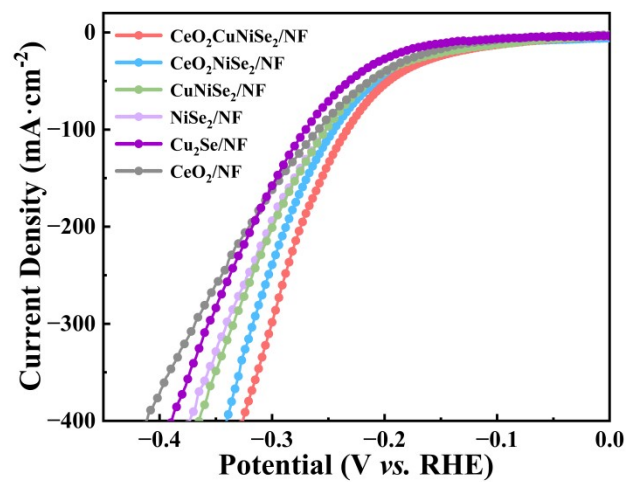

**Figure S10.** LSV curves of CeO<sub>2</sub>-CuNiSe<sub>2</sub>/NF, CeO<sub>2</sub>-NiSe<sub>2</sub>/NF, CuNiSe<sub>2</sub>/NF, NiSe<sub>2</sub>/NF, Cu<sub>2</sub>Se/NF, and CeO<sub>2</sub>/NF.

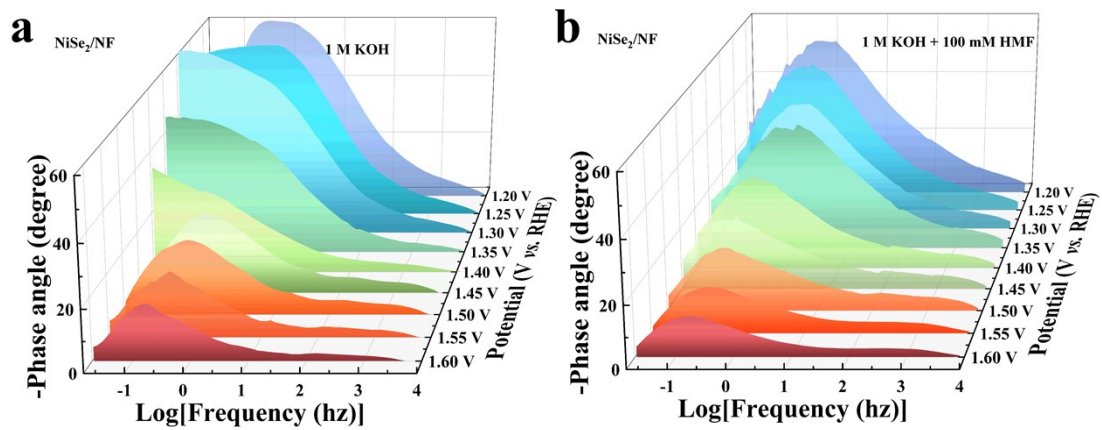

Figure S11. Bode plots of NiSe<sub>2</sub>/NF (a and b)

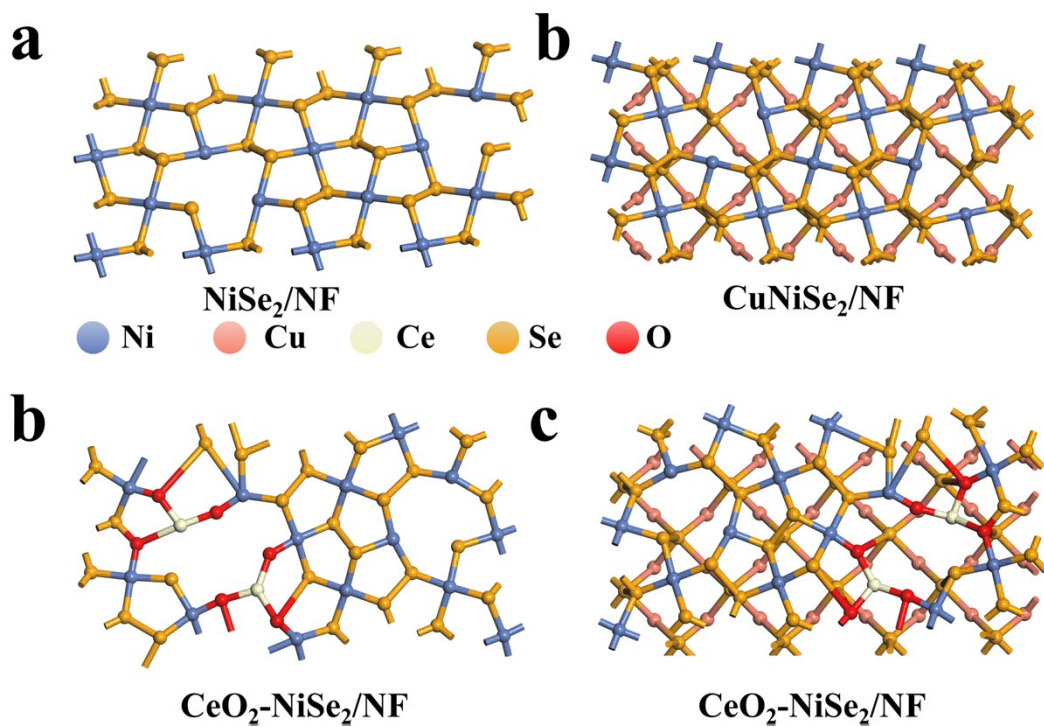

**Figure S12.** Top view of theoretical models of NiSe<sub>2</sub>/NF, CuNiSe<sub>2</sub>/NF, CeO<sub>2</sub>-NiSe<sub>2</sub>/NF, and CeO<sub>2</sub>-CuNiSe<sub>2</sub>/NF.

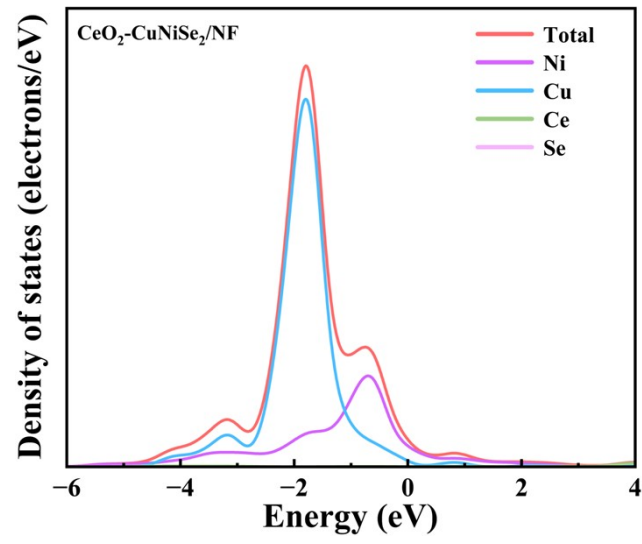

Figure S13. PDOS of CeO<sub>2</sub>-CuNiSe<sub>2</sub>/NF.

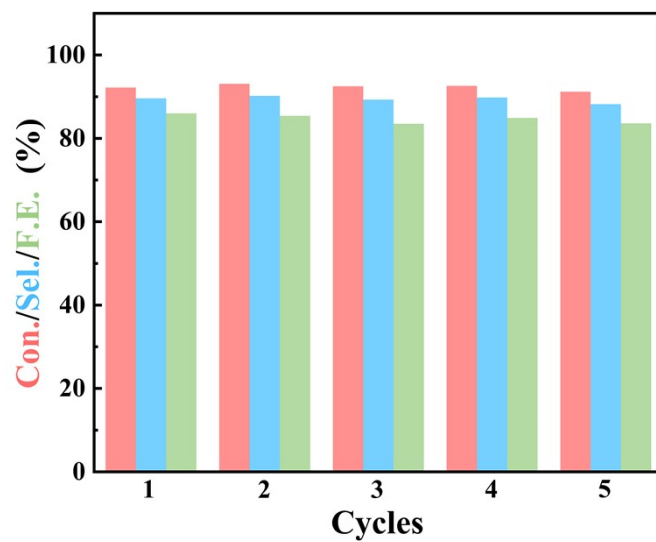

**Figure S14.**HMF conversion, FDCA selectivity, and FE of CeO<sub>2</sub>-CuNiSe<sub>2</sub>/NF during five consecutive electrolysis cycles in a flow cell.

**Table S1.** Elemental composition (weight percentage) obtained from ICP analysis.

| Entry | Catalyst                                                   | Composition |         |         |         |
|-------|------------------------------------------------------------|-------------|---------|---------|---------|
|       |                                                            | Ce wt.%     | Cu wt.% | Ni wt.% | Se wt.% |
| 1     | CeO <sub>2</sub> -CuNiSe <sub>2</sub> /NF                  | 2.10        | 5.31    | 29.22   | 63.37   |
| 2     | CeO <sub>2</sub> -CuNiSe <sub>2</sub> /NF after HMFOR test | 3.36        | 6.90    | 32.41   | 57.33   |

**Table S2. Comparison of HMFOR activity of CeO<sub>2</sub>-CuNiSe<sub>2</sub>/NF with other reported electrocatalysts**

| Catalysts                                   | HMF Concentration (mM) | Voltage (V vs. RHE) | Current Density (mA cm <sup>-2</sup> ) | Selec. (%) | Ref.              |
|---------------------------------------------|------------------------|---------------------|----------------------------------------|------------|-------------------|
| CeO <sub>2</sub> -CuNiSe <sub>2</sub> /NF   | 100                    | 1.5                 | 1230                                   | 98.3       | This work         |
| Pd-NiCo <sub>2</sub> O <sub>4</sub>         | 50                     | 1.5                 | 800                                    | 99.5       | [ <sup>1</sup> ]  |
| NiFe-LDH                                    | 100                    | 1.5                 | 300                                    | 98         | [ <sup>2</sup> ]  |
| MoNi <sub>4</sub> /NF                       | 100                    | 1.5                 | 90                                     | 98.7       | [ <sup>3</sup> ]  |
| Pt/CuO@CF                                   | 100                    |                     |                                        | 97.8       | [ <sup>4</sup> ]  |
| NiS <sub>x</sub> /β-Ni(OH) <sub>2</sub> /Ni | 50                     | 1.4                 | 392                                    | 97.7       | [ <sup>5</sup> ]  |
| CoNi <sub>3</sub> S <sub>2</sub> @NF        | 50                     | 1.4                 | 368                                    |            | [ <sup>6</sup> ]  |
|                                             |                        | 1.45                | 497                                    |            |                   |
| CC@NiFeCe-LDH                               | 50                     | 1.47                | 100                                    | 93.3       | [ <sup>7</sup> ]  |
| NF/CoOOH@CeO <sub>2</sub>                   | 50                     | 1.4                 | 110                                    | 92.5       | [ <sup>8</sup> ]  |
| CuH_NWs@Ce:NiH_Ns                           | 10                     | 1.43                | 100                                    | 97.9       | [ <sup>9</sup> ]  |
| Ni-Cu/NF                                    | 50                     | 1.4                 | 500                                    |            | [ <sup>10</sup> ] |
|                                             |                        | 1.5                 | 1000                                   |            |                   |
| Pt/Ni(OH) <sub>2</sub>                      | 50                     | 1.45                | 30                                     |            | [ <sup>11</sup> ] |
| NiFe-1                                      | 100                    | 1.425               | 700                                    |            | [ <sup>12</sup> ] |

**Table S3. Comparison of cell voltage of CeO<sub>2</sub>-CuNiSe<sub>2</sub>/NF||CeO<sub>2</sub>-CuNiSe<sub>2</sub>/NF system for HER-HMFOR at 10 mA cm<sup>-2</sup> with the reported electrocatalysts in two-electrode alkaline electrolytic cell.**

| Catalysts                                 | HMF<br>Concentration<br>(mM) | Cell Voltage | Ref.      |
|-------------------------------------------|------------------------------|--------------|-----------|
| CeO <sub>2</sub> -CuNiSe <sub>2</sub> /NF | 100                          | 1.29V        | This work |
| Rh-SA/NiFe NMLDH                          | 50                           | 1.32 V       | [13]      |
| Cu/Ni <sub>3</sub> S <sub>2</sub> -R      | 20                           | 1.33 V       | [14]      |
| Cu <sub>x</sub> S@NiCo-LDH                | 10                           | 1.34 V       | [15]      |
| Ni <sub>8</sub> PBA/CP                    | 50                           | 1.35 V       | [16]      |
| NF@Mo-Ni <sub>0.85</sub> Se               | 10                           | 1.41 V       | [17]      |
| NiCu NTs                                  | 20                           | 1.48 V       | [18]      |
| Cu-NiFe PBA                               | 100                          | 1.48 V       | [19]      |
| NiSe/NiO <sub>x</sub>                     | 10                           | 1.49 V       | [20]      |

## REFERENCES

- 1 X. Jiang, X. Ma, Y. Yang, Y. Liu, Y. Liu, L. Zhao, P. Wang, Y. Zhang, Y. Lin and Y. Wei, *Nano-Micro Lett.*, 2024, 16, 275.
- 2 W.-J. Liu, L. Dang, Z. Xu, H.-Q. Yu, S. Jin and G. W. Huber, *ACS Catal.*, 2018, 8, 5533–5541.
- 3 H. Liu, J. Xia, X. Liu, Y. Hu, M. Shakouri, H. Wu, M. Zhu, Y. Guo, J. Chen, H. Wang and Y. Wang, *ChemSusChem*, 2025, 18, e202401516.
- 4 J. Li, R. Qiu, S. Zhang, L. Peng, Y. Dong, Y. Jiang, Y. Li, N. Fang, J. Yu, J.-C. Dong, H. Zheng, L. Ding, J. Wan, I. Akpinar, J. Kuang, G. Chen, J. Ye, Y. Sun, L. Lin, S. Zheng, S. Yang, J. Li and J.-F. Li, *Adv. Mater.*, 2025, 37, 2417684.
- 5 C. Liu, X.-R. Shi, K. Yue, P. Wang, K. Zhan, X. Wang, B. Y. Xia and Y. Yan, *Adv. Mater.*, 2023, 35, 2211177.
- 6 Y. Sun, J. Wang, Y. Qi, W. Li and C. Wang, *Adv. Sci.*, 2022, 9, 2200957.
- 7 Y. Zhang, G. Hai, Z. Huang, Z. Liu, X. Huang and G. Wang, *Adv. Energy Mater.*, 2024, 14, 2401449.
- 8 P. Zhou, H. Pan, G. Hai, X. Liu, X. Huang and G. Wang, *J. Energy Chem.*, 2024, 98, 721–732.
- 9 G. Ren, B. Liu, L. Liu, M. Hu, J. Zhu, X. Xu, P. Jing, J. Wu and J. Zhang, *Inorg. Chem.*, 2023, 62, 12534–12547.
- 10 D. Chen, Y. Ding, X. Cao, L. Wang, H. Lee, G. Lin, W. Li, G. Ding and L. Sun, *Angew. Chem. Int. Ed.*, 2023, 62, e202309478.
- 11 B. Zhou, Y. Li, Y. Zou, W. Chen, W. Zhou, M. Song, Y. Wu, Y. Lu, J. Liu, Y. Wang and S. Wang, *Angewandte Chemie International Edition*, 2021, 60, 22908–22914.
- 12 C. Wang, Y. Wu, A. Bodach, M. L. Krebs, W. Schuhmann and F. Schüth, *Angewandte Chemie International Edition*, 2023, 62, e202215804.
- 13 L. Zeng, Y. Chen, M. Sun, Q. Huang, K. Sun, J. Ma, J. Li, H. Tan, M. Li, Y. Pan, Y. Liu, M. Luo, B. Huang and S. Guo, *Journal of the American Chemical Society*, 2023, 145, 17577–17587.
- 14 P. Xu, Z. Bao, Y. Zhao, L. Zheng, Z. Lv, X. Shi, H.-E. Wang, X. Fang and H. Zheng, *Advanced Energy Materials*, 2024, 14, 2303557.
- 15 X. Deng, X. Kang, M. Li, K. Xiang, C. Wang, Z. Guo, J. Zhang, X.-Z. Fu and J.-L. Luo, *Journal of Materials Chemistry A*, 2020, 8, 1138–1146.
- 16 N.-Y. Huang, B. Chu, D. Chen, B. Shao, Y.-T. Zheng, L. Li, X. Xiao and Q. Xu, *Journal of the American Chemical Society*, 2025, 147, 8832–8840.
- 17 C. Yang, C. Wang, L. Zhou, W. Duan, Y. Song, F. Zhang, Y. Zhen, J. Zhang, W. Bao, Y. Lu, D. Wang and F. Fu, *Chemical Engineering Journal*, 2021, 422, 130125.
- 18 L. Zheng, Y. Zhao, P. Xu, Z. Lv, X. Shi and H. Zheng, *Journal of Materials Chemistry A*, 2022, 10, 10181–10191.
- 19 Z. Liu, T. Xiao, X. Wu, C. Hu, X. F. Lu, H. Zhang, J. Zhang, X. Bao and P. Yuan, *Applied Catalysis B: Environment and Energy*, 2025, 378, 125601.
- 20 L. Gao, Z. Liu, J. Ma, L. Zhong, Z. Song, J. Xu, S. Gan, D. Han and L. Niu, *Applied Catalysis B: Environmental*, 2020, 261, 118235.
